# Supplementary material for: Soil Microbial Fuel Cell Based Self-Powered Cathodic Biosensor for Sensitive Detection of Heavy Metals
Source: Biosensors (Basel). 2023 Jan 15;13(1):145. doi: 10.3390/bios13010145 (PMC9855947; doi:10.3390/bios13010145)
Supplement: Supplementary file 1 [file biosensors-13-00145-s001.zip › biosensors-2111514-supplementary.pdf]

# Soil microbial fuel cell based self-powered cathodic biosensor for sensitive detection of heavy metals

Shi-Hang Wang <sup>1</sup>, Jian-Wei Wang <sup>1</sup>, Li-Ting Zhao <sup>1</sup>, Syed Zaghun Abbas <sup>1</sup>, Zhugen Yang <sup>2</sup> and Yang-Chun Yong <sup>1,\*</sup>

<sup>1</sup>Biofuels Institute, Jiangsu Collaborative Innovation Center of Technology and Material of Water Treatment, School of Emergency Management & School of Environment and Safety Engineering, Zhenjiang 212013, Jiangsu Province, China.

<sup>2</sup>School of Water, Environment and Energy, Cranfield University, Milton Keynes MK43 0AL, United Kingdom

\* Correspondence: ycyong@ujs.edu.cn

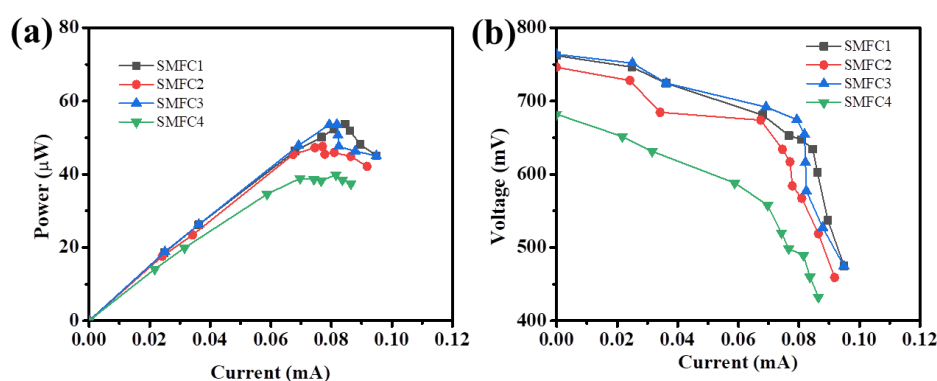

Figure S1. The power output (a) and polarization curves (b) of these four SMFCs.

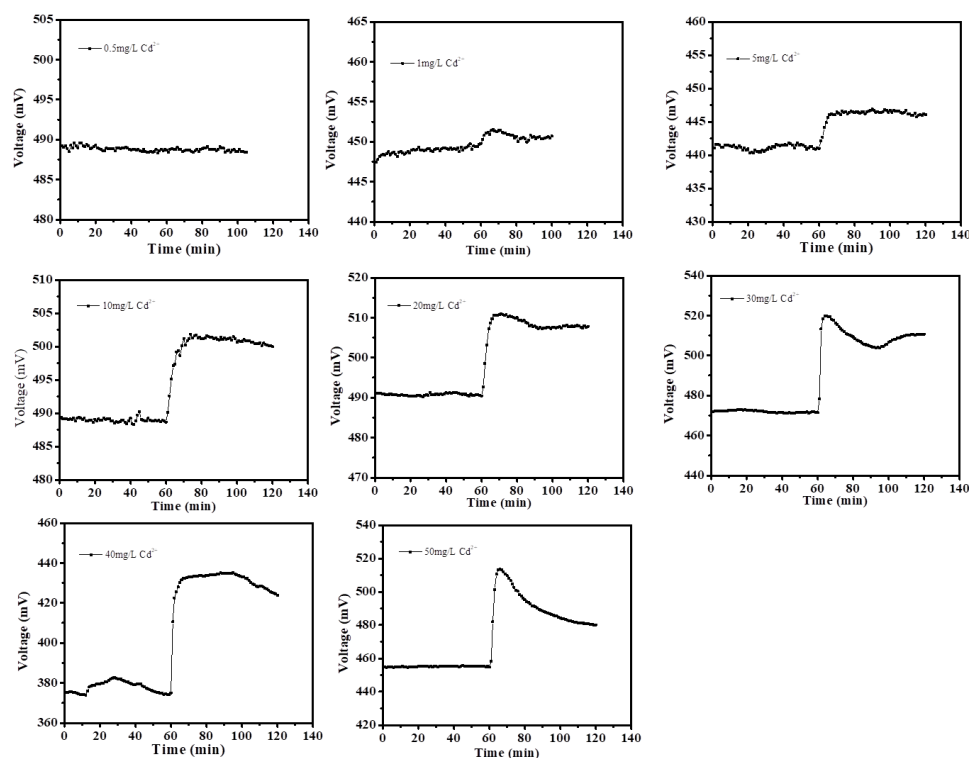

**Figure S2.** The response of SMFC based sensing system to the addition of  $\text{Cd}^{2+}$  at different concentrations.

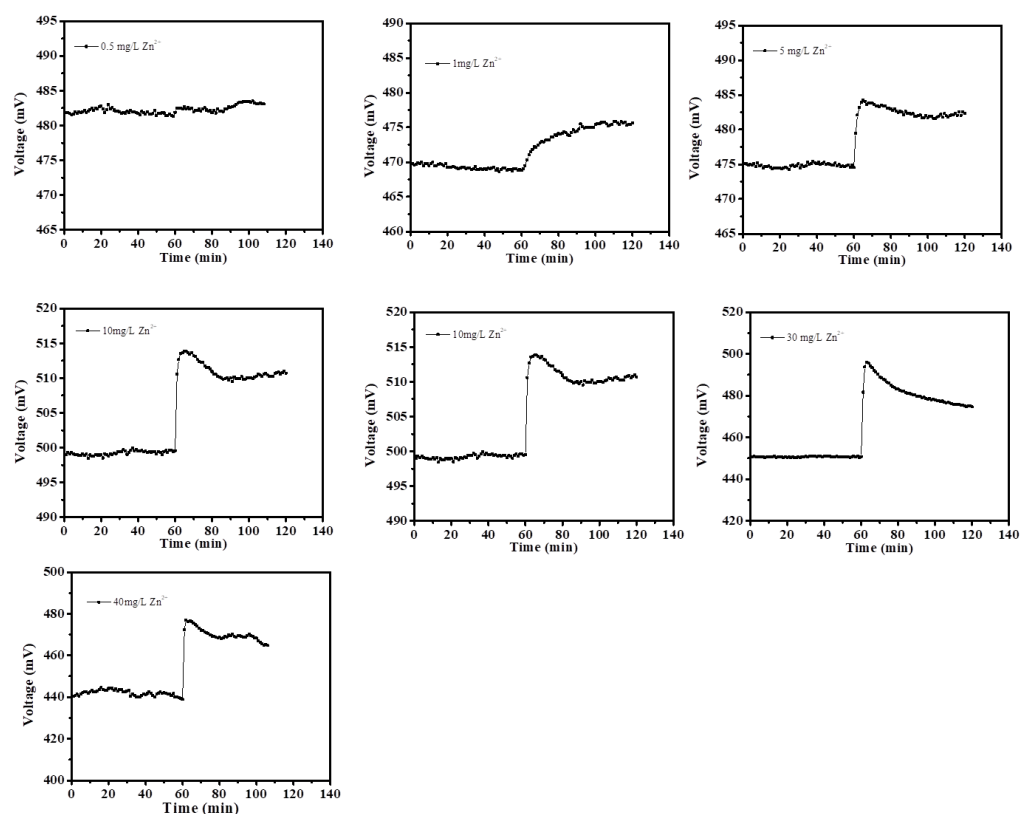

**Figure S3.** The response of SMFC based sensing system to the addition of  $\text{Zn}^{2+}$  at different concentrations.

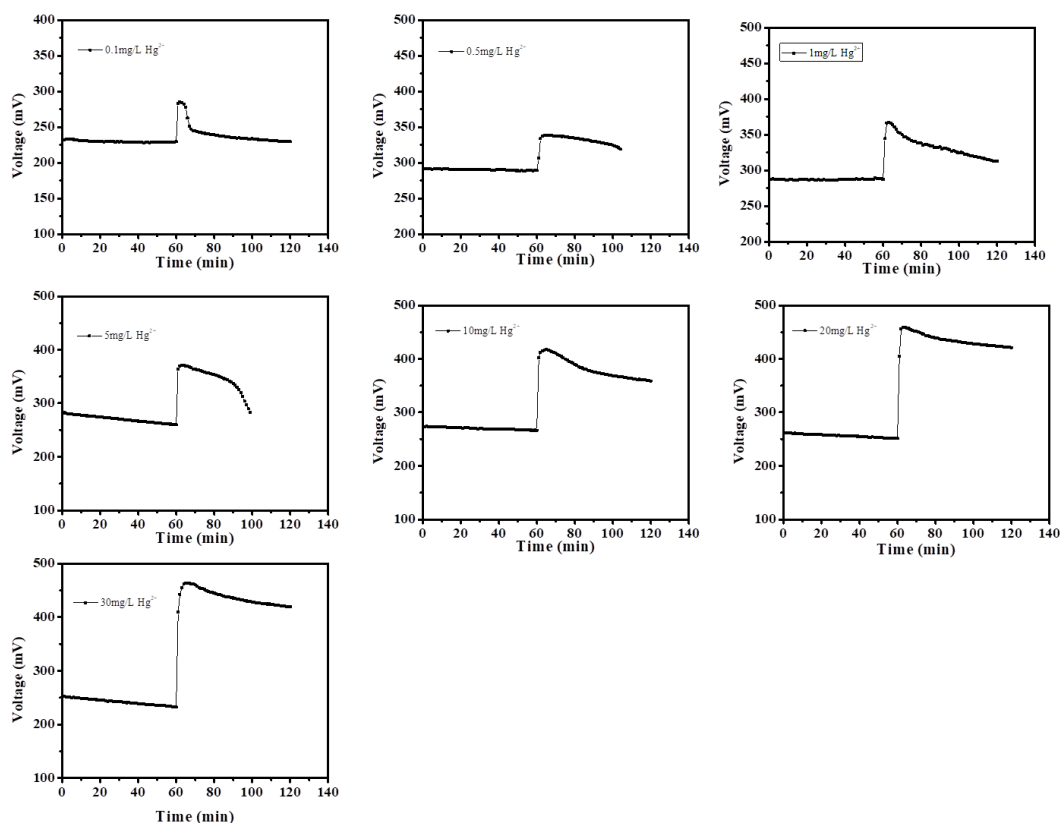

**Figure S4.** The response of SMFC based sensing system to the addition of  $\text{Hg}^{2+}$  at different concentrations.

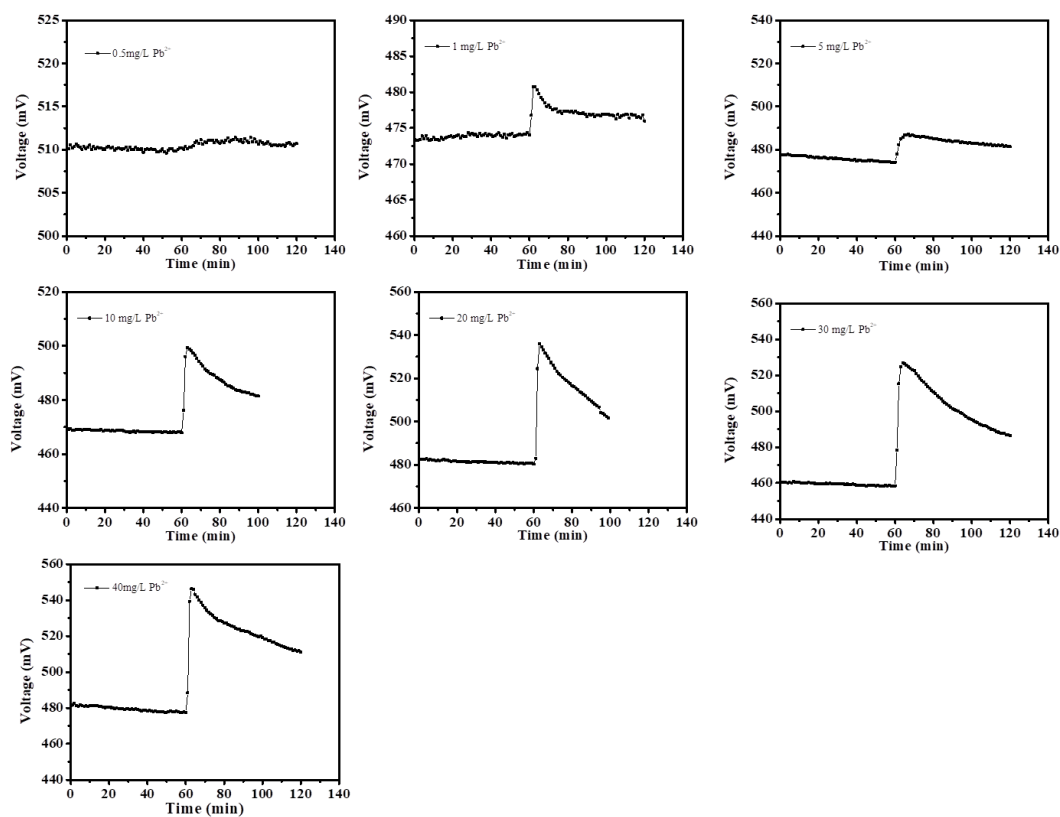

**Figure S5.** The response of SMFC based sensing system to the addition of  $\text{Pb}^{2+}$  at different concentrations.

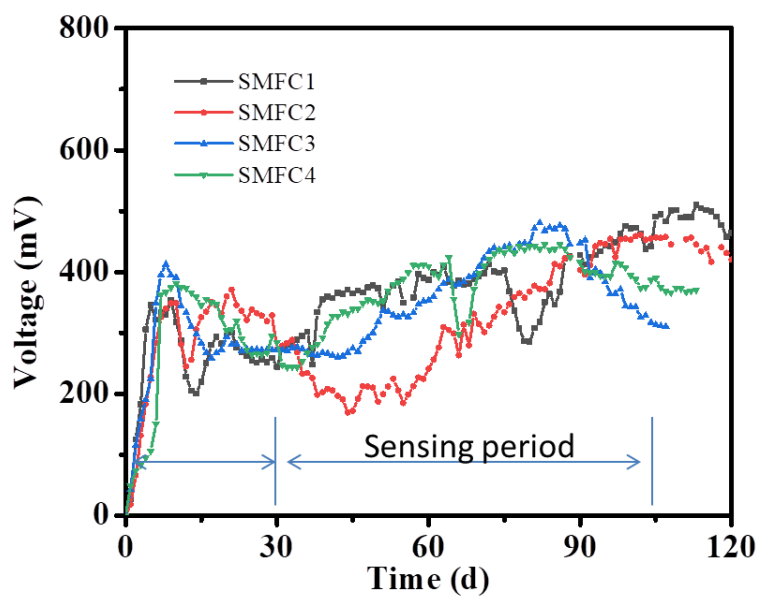

**Figure S6.** The long-term voltage output of these four SMFCs.
